# Supplementary material for: Lung-specific loss of the laminin α3 subunit confers resistance to mechanical injury
Source: Oxford University Press journal article supplement (doi:10.1242/jcs.080911), 2011-08-30
Supplement: jcs080911figs1.pdf [file jcs080911figs1.pdf]

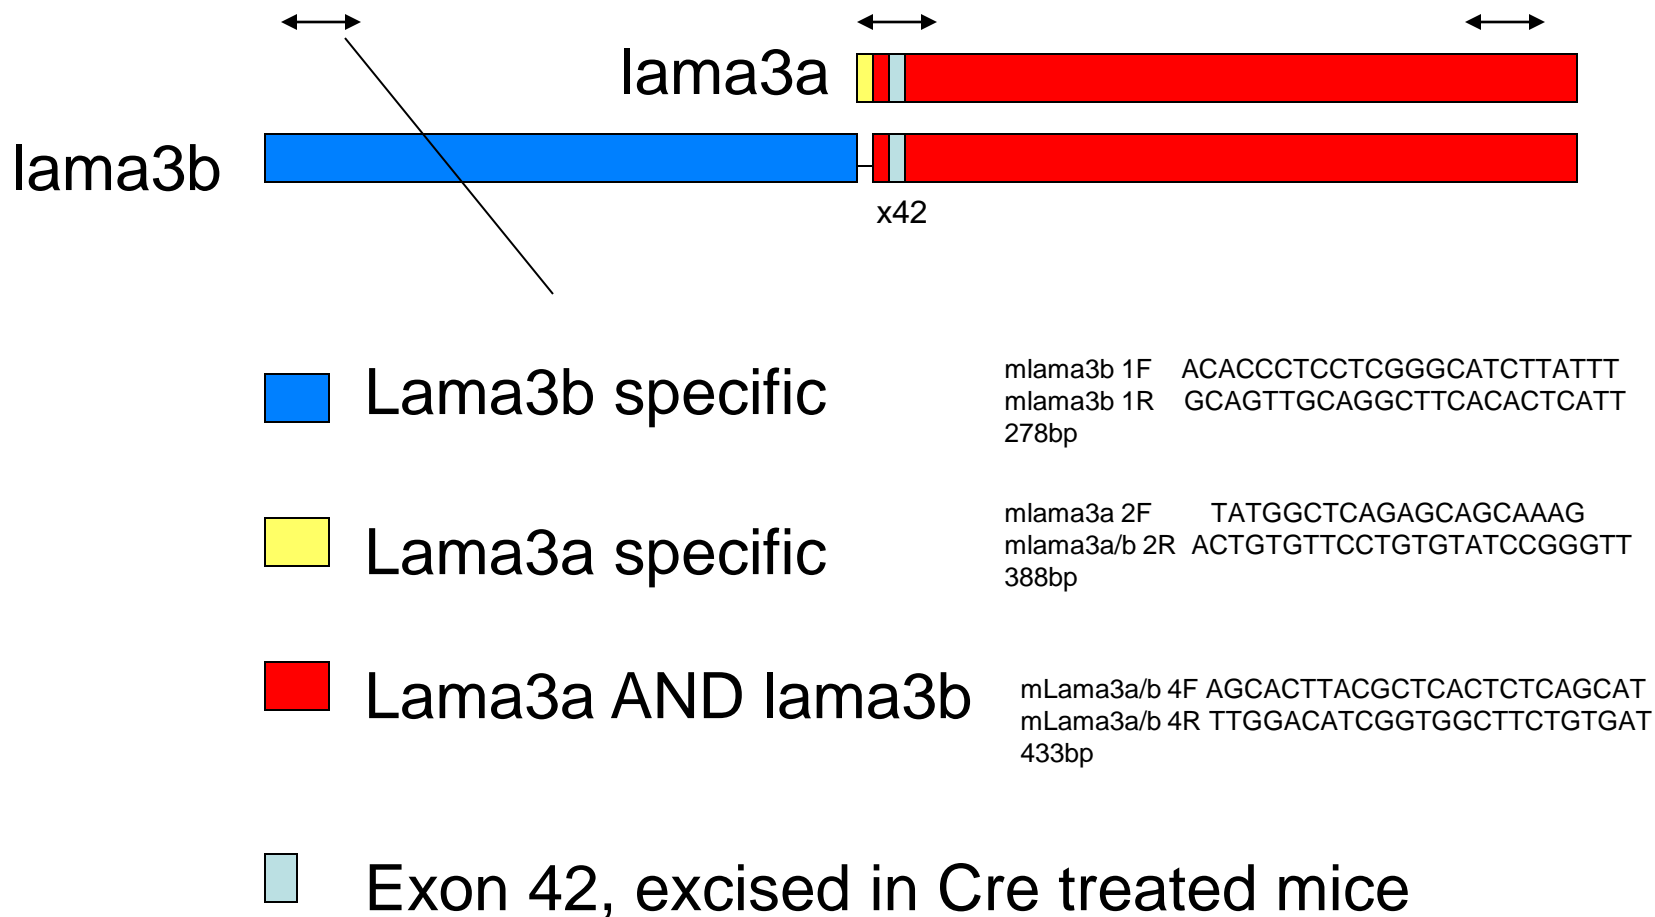

**Supplemental Data Figure S1.** Primer sequences to analyze knockdown of the  $\alpha 3$  laminin gene. Schematic of the gene is found in the top panel, the arrows indicate the sites of the three primer sequences. Exon 42 (x42) is the site of the loxP sites. All values were normalized to GAPDH (Forward: 5'-AATGTGTCCGTCGTGGATCT) Reverse: 5'-CCCTGTTGCTGTAGCCGTAT)
