# Supplementary material for: Lung-specific loss of the laminin α3 subunit confers resistance to mechanical injury
Source: Oxford University Press journal article supplement (doi:10.1242/jcs.080911), 2011-08-30
Supplement: jcs080911figs2.pdf [file jcs080911figs2.pdf]

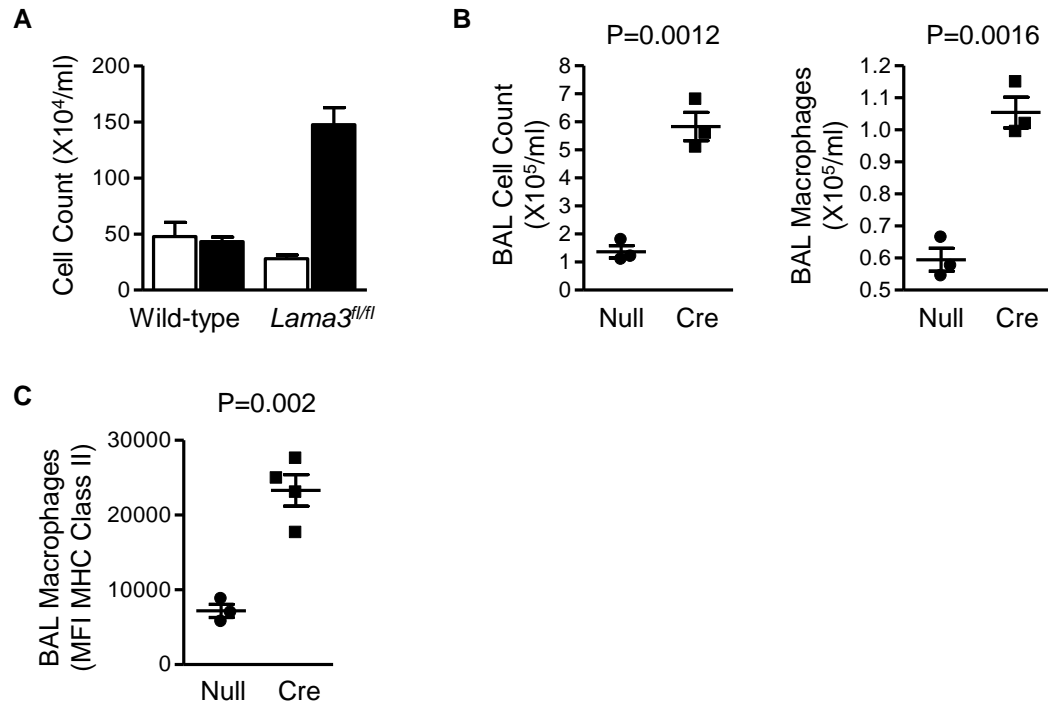

**Supplemental Data Figure S2.** Lung inflammation associated with the loss of  $\alpha 3$  laminin. **(A)** Wild-type or *Lama3<sup>fl/fl</sup>* mice were treated Ad-Null or Ad-Cre and 60 days later a BAL was performed for measurement of total cell count (hemacytometer). **(B)** BAL fluid cells were quantified using flow cytometry, **(C)** Expression of the macrophage activation marker MHC Class II on BAL fluid macrophages was quantified using flow cytometry. Values above graphs indicate P values for comparison between Null and Cre.  $N \geq 3$  for all measures.
