# Supplementary material for: Lung-specific loss of the laminin α3 subunit confers resistance to mechanical injury
Source: Oxford University Press journal article supplement (doi:10.1242/jcs.080911), 2011-08-30
Supplement: jcs080911figs3.pdf [file jcs080911figs3.pdf]

# Blood

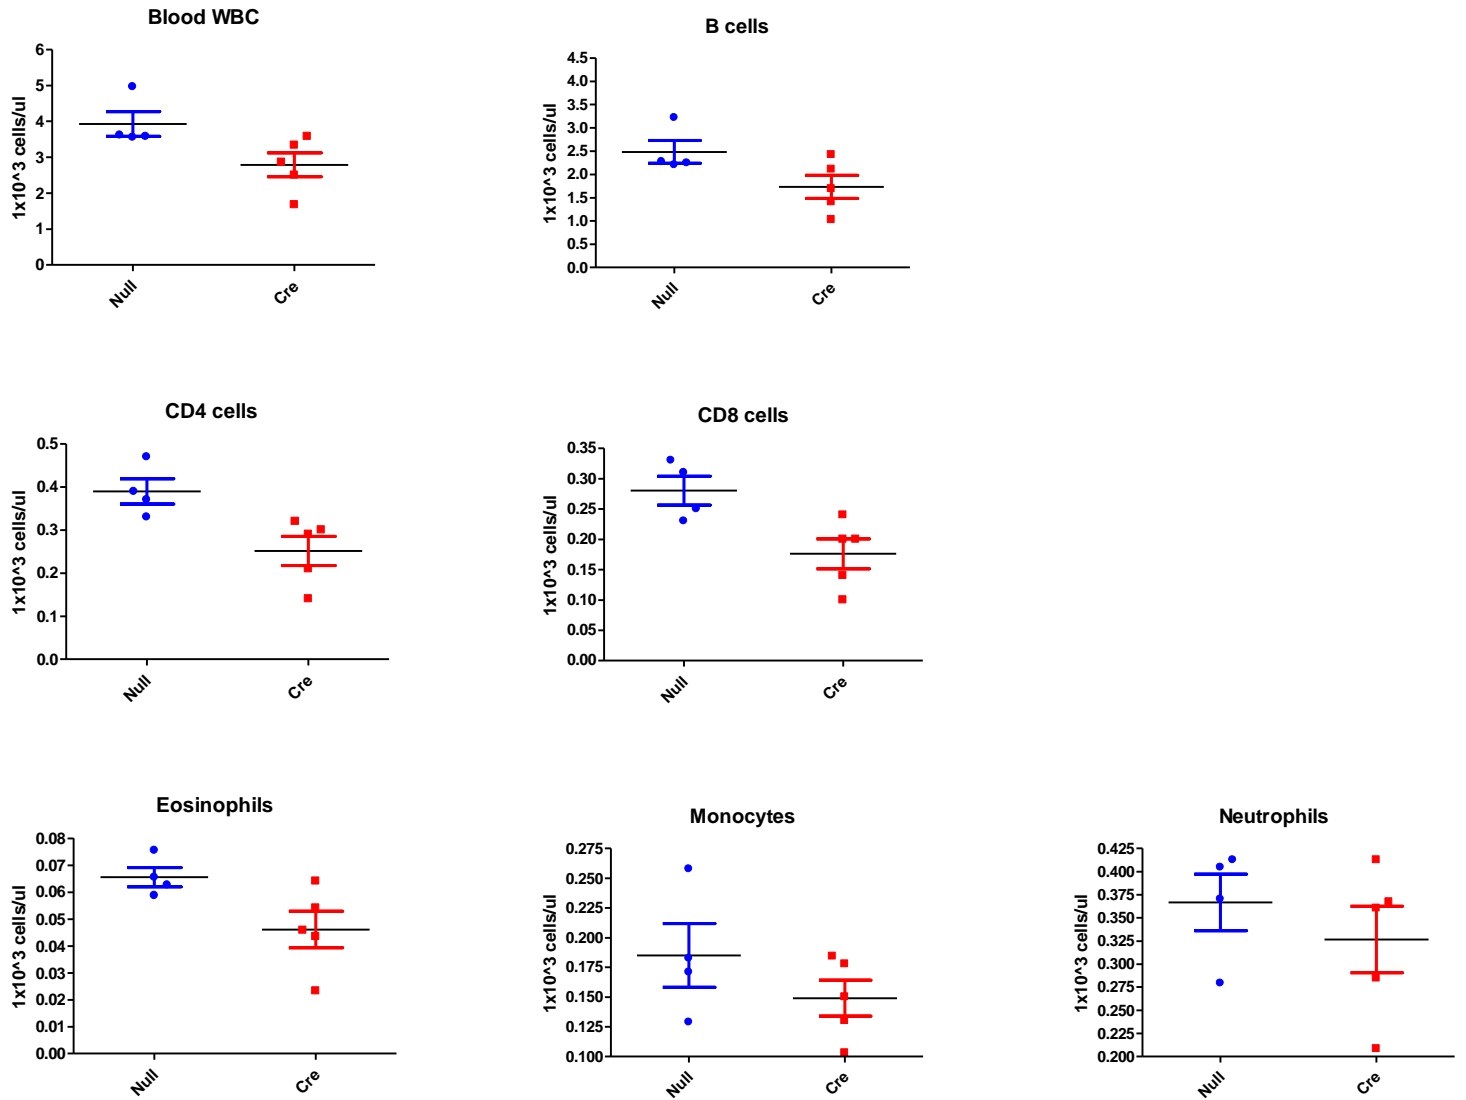

**Supplemental Data Figure S3. Blood levels of inflammatory cells.** (A) Wild-type or *Lama3<sup>fl/fl</sup>* mice were treated Ad-Null or Ad-Cre and 60 days later blood was collected for quantification of the leukocyte subsets indicated. N=3 for all measures, no statistically significant differences were observed between Null and Cre treated animals.
