# Supplementary material for: Lung-specific loss of the laminin α3 subunit confers resistance to mechanical injury
Source: Oxford University Press journal article supplement (doi:10.1242/jcs.080911), 2011-08-30
Supplement: jcs080911figs4.pdf [file jcs080911figs4.pdf]

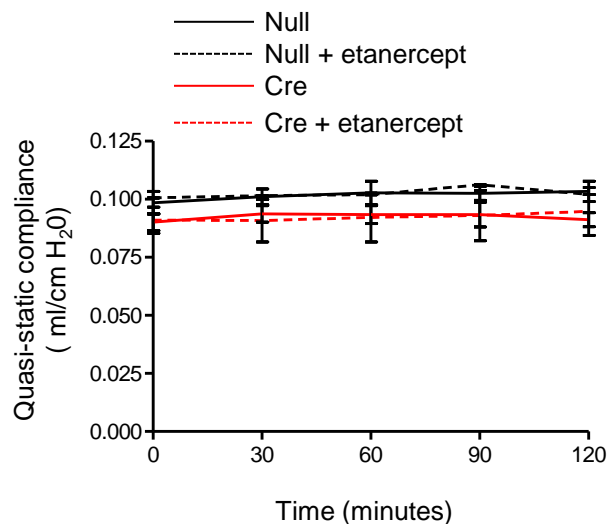

**Supplemental Data Figure S4. Non-injurious ventilation does not alter lung compliance in wild-type or  $\alpha 3$  laminin knockdown mice.** *Lama3<sup>fl/fl</sup>* mice were treated with a null adenovirus (null) or an adenovirus encoding Cre recombinase (Cre) and 60 days later were subjected to 2 hours of non-injurious ( $V_T$  12 ml/kg) mechanical ventilation using a flexivent ventilator (minute ventilation matched, PEEP = 0) and quasi-static lung compliance was assessed every 30 minutes during the mechanical ventilation.
