# Supplementary material for: Lung-specific loss of the laminin α3 subunit confers resistance to mechanical injury
Source: Oxford University Press journal article supplement (doi:10.1242/jcs.080911), 2011-08-30
Supplement: jcs080911figs5.pdf [file jcs080911figs5.pdf]

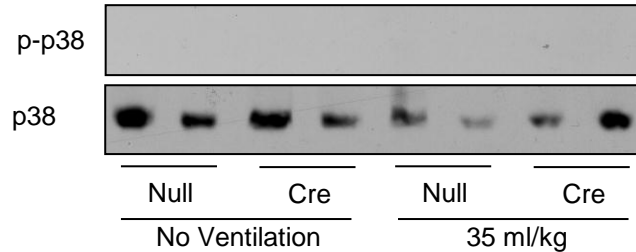

**Supplemental Data Figure S5. No activation of p38 is detected in the lung following injurious ventilation.** *Lama3<sup>fl/fl</sup>* mice were treated with a null adenovirus (Null) or an adenovirus encoding Cre recombinase (Cre) and 60 days later were untreated or subjected to injurious ( $V_T$  35 ml/kg) mechanical ventilation using a flexivent ventilator (minute ventilation matched, PEEP = 0). After 20 mins, lung homogenates were immunoblotted using antibodies against phosphorylated and total p38, each lane represents a separate animal.
