# Supplementary material for: Lung-specific loss of the laminin α3 subunit confers resistance to mechanical injury
Source: Oxford University Press journal article supplement (doi:10.1242/jcs.080911), 2011-08-30
Supplement: jcs080911figs6.pdf [file jcs080911figs6.pdf]

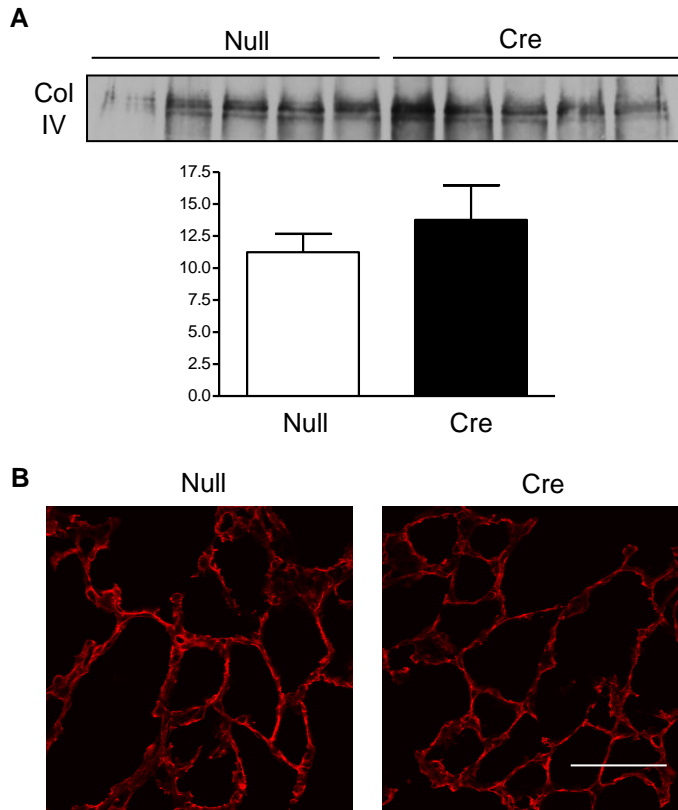

**Supplemental Data Figure S6. Collagen IV is unchanged in Lama3 knockdown mice.** *Lama3<sup>fl/fl</sup>* mice were treated with a null adenovirus (null) or an adenovirus encoding Cre recombinase (Cre) and **(A)** whole lung homogenates were obtained 60 days later and immunoblotted using an antibody against collagen IV. **(B)** Frozen lung sections were obtained from identically treated mice.
