# Supplementary material for: Lung-specific loss of the laminin α3 subunit confers resistance to mechanical injury
Source: Oxford University Press journal article supplement (doi:10.1242/jcs.080911), 2011-08-30
Supplement: jcs080911tables1.pdf [file jcs080911tables1.pdf]

**Table S1. Antibodies used for immunophenotyping**

| <b>Cocktail 1: BAL and digested lung</b> |                     |              |                     |
|------------------------------------------|---------------------|--------------|---------------------|
| <b>Marker</b>                            | <b>Fluorochrome</b> | <b>Clone</b> | <b>Manufacturer</b> |
| CD45                                     | PerCPCy5.5          | 30-11        | BD Biosciences      |
| CD11b                                    | eFluor450           | M1/70        | eBioscience         |
| CD11c                                    | PECy7               | HL3          | BD Biosciences      |
| F4/80                                    | PETxRd              | BM8          | Invitrogen          |
| Gr-1                                     | APCCy7              | RB6-8C5      | BD Biosciences      |
| CD40                                     | Alexa Fluor 647     | HM40-3       | Biolegend           |
| CD86                                     | Alexa Fluor 700     | GL1          | BD Biosciences      |
| CD62L                                    | PE                  | MEL-14       | BD Biosciences      |
| MHC II                                   | FITC                | M5/114.15.2  | BD Biosciences      |

| <b>Cocktail 2: Digested lung</b> |                     |              |                     |
|----------------------------------|---------------------|--------------|---------------------|
| <b>Marker</b>                    | <b>Fluorochrome</b> | <b>Clone</b> | <b>Manufacturer</b> |
| CD45                             | PerCPCy5.5          | 30-11        | BD Biosciences      |
| CD11b                            | eFluor450           | M1/70        | eBioscience         |
| CD11c                            | PECy7               | HL3          | BD Biosciences      |
| Ly6C                             | FITC                | AL21         | BD Biosciences      |
| Ly6G                             | PE                  | 1A8          | BD Biosciences      |
| B220                             | PETxRd              | RA3-6B2      | BD Biosciences      |
| CD3                              | APC                 | 145-2C11     | BD Biosciences      |
| CD4                              | Pacific Orange      | RM4-5        | BD Biosciences      |
| CD8                              | APCCy7              | 53-6.7       | BD Biosciences      |
| NK1.1                            | Alexa Fluor 700     | PK136        | BD Biosciences      |

| <b>Cocktail 3: Blood</b> |                     |              |                     |
|--------------------------|---------------------|--------------|---------------------|
| <b>Marker</b>            | <b>Fluorochrome</b> | <b>Clone</b> | <b>Manufacturer</b> |
| CD45                     | Pacific Orange      | 30-11        | BD Biosciences      |
| CD11b                    | eFluor450           | M1/70        | eBioscience         |
| Gr-1                     | FITC                | RB6-8C5      | BD Biosciences      |
| CD115                    | PE                  | AFS98        | eBioscience         |
| B220                     | PETxRd              | RA3-6B2      | BD Biosciences      |
| CD62L                    | APC                 | MEL-14       | BD Biosciences      |
| CD4                      | PerCPCy5.5          | RM4-5        | BD Biosciences      |
| CD8                      | APCCy7              | 53-6.7       | BD Biosciences      |
| NK1.1                    | Alexa Fluor 700     | PK136        | BD Biosciences      |
