# Supplementary material for: Lung-specific loss of the laminin α3 subunit confers resistance to mechanical injury
Source: Oxford University Press journal article supplement (doi:10.1242/jcs.080911), 2011-08-30
Supplement: jcs080911tables2.pdf [file jcs080911tables2.pdf]

**Table S2. BD LSR II instrument configuration**

| <b>Laser</b>         | <b>PMT Slot</b> | <b>Filter</b> | <b>Mirror</b> | <b>Channel</b>      |
|----------------------|-----------------|---------------|---------------|---------------------|
| Blue (488nm)/FSC     | A               | 710/50        | 685LP         | PerCPCy5.5          |
|                      | B               | 525/50        | 505LP         | FITC                |
|                      | C               | 488/10        |               | SSC                 |
| Red (640nm)          | A               | 780/60        | 735LP         | APCCy7              |
|                      | B               | 730/745       | 690LP         | Alexa Fluor 700     |
|                      | C               | 670/30        |               | APC/Alexa Fluor 647 |
| Yellow-green (561nm) | A               | 780/60        | 735LP         | PECy7               |
|                      | B               | 610/20        | 600LP         | PETexas Red         |
|                      | C               | 582/15        |               | PE                  |
| Violet (405nm)       | A               | 582/15        | 570LP         | Pacific Orange      |
|                      | B               | 450/50        |               | eFluor 450          |
