# Supplementary material for: Lung-specific loss of the laminin α3 subunit confers resistance to mechanical injury
Source: Oxford University Press journal article supplement (doi:10.1242/jcs.080911), 2011-08-30
Supplement: jcs080911tables3.pdf [file jcs080911tables3.pdf]

**Table S3. Definition of populations for flow cytometry**

|                                                         |                                                                                                                                                                                                               |
|---------------------------------------------------------|---------------------------------------------------------------------------------------------------------------------------------------------------------------------------------------------------------------|
| Alveolar macrophages                                    | CD45 <sup>+</sup> CD11c <sup>+</sup> F4/80 <sup>intermediate</sup> CD11b <sup>intermediate</sup>                                                                                                              |
| Neutrophils                                             | CD45 <sup>+</sup> CD11b <sup>high</sup> Gr-1 <sup>high</sup> SSC <sup>high</sup> or CD45 <sup>+</sup> CD11b <sup>high</sup> Ly6G <sup>+</sup>                                                                 |
| Ly6C <sup>high</sup> Interstitial monocytes/macrophages | CD45 <sup>+</sup> CD11b <sup>high</sup> Gr-1 <sup>intermediate</sup> or CD45 <sup>+</sup> CD11b <sup>high</sup> Ly6C <sup>high</sup> Ly6G <sup>negative</sup>                                                 |
| Ly6C <sup>low</sup> Interstitial monocytes/macrophages  | CD45 <sup>+</sup> CD11b <sup>high</sup> Gr-1 <sup>low/negative</sup> MHC II <sup>+</sup> or CD45 <sup>+</sup> CD11b <sup>high</sup> Ly6C <sup>low/negative</sup> Ly6G <sup>negative</sup> MHC II <sup>+</sup> |
| B cells                                                 | CD45 <sup>+</sup> CD11b <sup>-</sup> B220 <sup>+</sup>                                                                                                                                                        |
| CD8 T cells                                             | CD45 <sup>+</sup> CD11b <sup>-</sup> CD3 <sup>+</sup> CD8 <sup>+</sup>                                                                                                                                        |
