# Supplementary material for: Lung-specific loss of the laminin α3 subunit confers resistance to mechanical injury
Source: Oxford University Press journal article supplement (doi:10.1242/jcs.080911), 2011-08-30
Supplement: jcs080911tables4.pdf [file jcs080911tables4.pdf]

**Table S4. Primer sequences for qRT-PCR**

|               | <b>Forward</b>           | <b>Reverse</b>            |
|---------------|--------------------------|---------------------------|
| Lama3<br>gene | CCCAACCTGAGATTACAAGCA    | CCAAAACCAAACATACCCCA      |
| mlama3b       | ACACCCTCCTCGGGCATCTTATTT | GCAGTTGCAGGCTTCACACTCATT  |
| mlama3a       | TGGTCAACACATGTCCCTCATCCA | ACTGTGTTCCCTGTGTATCCGGGTT |
| mLama3a/b     | AGCACTTACGCTCACTCTCAGCAT | TTGGACATCGGTGGCTTCTGTGAT  |
| GAPDH         | AATGTGTCCGTCGTGGATCT     | CCCTGTTGCTGTAGCCGTAT      |
